# Supplementary material
Source: PubMed Central journal article supplement (PMC8174028)
Supplement: NEJMc2104849_disclosures.pdf [file NEJMc2104849_disclosures.pdf]

**Disclosure Purpose:** 21-04849

Summary of Interests

I do not have any interests to disclose at this time.

Additional Questions:

- 1. **Are there other relationships or activities that readers could perceive to have influenced, or that give the appearance of potentially influencing, what you wrote in the submitted work?**  
No.
- 2. **What is the manuscript title?**  
"Incident SARS-CoV-2 Infections Among mRNA-Vaccinated and Unvaccinated Nursing Home Residents,"
- 3. **Are you the corresponding author?**  
No.

Certification

I certify that the information provided in this disclosure is complete and accurate.

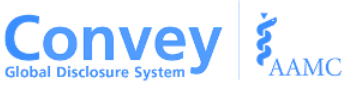

**Disclosure Purpose:** 21-04849

**Summary of Interests**

I do not have any interests to disclose at this time.

**Additional Questions:**

- 1. **Are there other relationships or activities that readers could perceive to have influenced, or that give the appearance of potentially influencing, what you wrote in the submitted work?**  
No.
- 2. **What is the manuscript title?**  
Incident SARS-CoV-2 Infections Among mRNA-Vaccinated and Unvaccinated Nursing Home Residents
- 3. **Are you the corresponding author?**  
No.

**Certification**

I certify that the information provided in this disclosure is complete and accurate.



Disclosure Purpose: 21-04849

## Summary of Interests

### Company or Organization

| Entity                                                                                                                                                                                                                                                                                             | Type                       | Interest Held By                                                                                                                                                                                                                    |
|----------------------------------------------------------------------------------------------------------------------------------------------------------------------------------------------------------------------------------------------------------------------------------------------------|----------------------------|-------------------------------------------------------------------------------------------------------------------------------------------------------------------------------------------------------------------------------------|
| Janssen Global Services, LLC                                                                                                                                                                                                                                                                       | Consultant                 | Self                                                                                                                                                                                                                                |
| <i>Category:</i> Consultant<br><i>Additional Information:</i>                                                                                                                                                                                                                                      |                            | <i>Description:</i> RSV vaccine development                                                                                                                                                                                         |
| Janssen Global Services, LLC                                                                                                                                                                                                                                                                       | End Point Review Committee | Self                                                                                                                                                                                                                                |
| <i>Category:</i> End Point Review Committee<br><i>Additional Information:</i> Activity completed in 2020                                                                                                                                                                                           |                            | <i>Description:</i> Related to RSV vaccine                                                                                                                                                                                          |
| Pfizer                                                                                                                                                                                                                                                                                             | Grant / Contract           | Self                                                                                                                                                                                                                                |
| <i>Recipient Name:</i> Brown University<br><i>Grant / Contract Description:</i> Evaluate effectiveness of conjugate pneumococcal vaccine in the long-term care setting                                                                                                                             |                            | <i>Recipient Type:</i> Institution<br><i>Grant / Contract Purpose:</i> Research<br><i>Additional Information:</i> Collaborative grant                                                                                               |
| Pfizer                                                                                                                                                                                                                                                                                             | Consultant                 | Self                                                                                                                                                                                                                                |
| <i>Category:</i> Consultant<br><i>Additional Information:</i> One day, related to pneumococcal vaccine development                                                                                                                                                                                 |                            | <i>Description:</i> Advisory Committee                                                                                                                                                                                              |
| SANOFI PASTEUR INC.                                                                                                                                                                                                                                                                                | Grant / Contract           | Self                                                                                                                                                                                                                                |
| <i>Recipient Name:</i> Insight Therapeutics<br><i>Grant / Contract Description:</i> Comparative effectiveness of recombinant influenza vaccine<br><i>Additional Information:</i> Insight Therapeutics contracts with Brown University for Dr. Gravenstein's services; investigator initiated grant |                            | <i>Recipient Type:</i> Institution<br><i>Grant / Contract Purpose:</i> Research                                                                                                                                                     |
| SANOFI PASTEUR INC.                                                                                                                                                                                                                                                                                | Consultant                 | Self                                                                                                                                                                                                                                |
| <i>Category:</i> Consultant<br><i>Additional Information:</i> Advisory Board                                                                                                                                                                                                                       |                            | <i>Description:</i> Influenza vaccine development                                                                                                                                                                                   |
| Seqirus USA Inc                                                                                                                                                                                                                                                                                    | Grant / Contract           | Self                                                                                                                                                                                                                                |
| <i>Recipient Name:</i> Insight Therapeutics<br><i>Grant / Contract Description:</i> RCT to study comparative effectiveness of adjuvanted vaccine in long-term care settings                                                                                                                        |                            | <i>Recipient Type:</i> Institution<br><i>Grant / Contract Purpose:</i> Research<br><i>Additional Information:</i> Insight Therapeutics contracts with Brown University for Dr. Gravenstein's services; investigator initiated grant |

### Additional Questions:

- Are there other relationships or activities that readers could perceive to have influenced, or that give the appearance of potentially influencing, what you wrote in the submitted work?  
No.
- What is the manuscript title?  
Incident SARS-CoV-2 Infections Among mRNA-Vaccinated and Unvaccinated Nursing Home Residents
- Are you the corresponding author?  
No.

### Certification

I certify that the information provided in this disclosure is complete and accurate.



Disclosure Purpose: 21-04849

Summary of Interests

**Company or Organization**

| Entity                                                            | Type  | Interest Held By                                    |
|-------------------------------------------------------------------|-------|-----------------------------------------------------|
| <a href="#">naviHealth</a>                                        | Other | Self                                                |
| <i>Category:</i> Other<br><i>Additional Information:</i> Retainer |       | <i>Description:</i> Chair Scientific Advisory Board |

Additional Questions:

- Are there other relationships or activities that readers could perceive to have influenced, or that give the appearance of potentially influencing, what you wrote in the submitted work?**  
Yes.
  - Please describe those relationships.**  
I have NIH grant support as PI of intervention studies that include Genesis HealthCare whose data were used in the current research letter
- What is the manuscript title?**  
Incident SARS-CoV-2 Infections Among mRNA-Vaccinated and Unvaccinated Nursing Home Residents
- Are you the corresponding author?**  
No.

Certification

I certify that the information provided in this disclosure is complete and accurate.

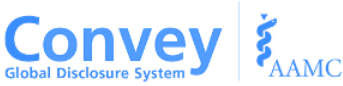

Disclosure Purpose: 21-04849

Summary of Interests

| Company or Organization                                                                                                                                                     |                  |                                                                                 |
|-----------------------------------------------------------------------------------------------------------------------------------------------------------------------------|------------------|---------------------------------------------------------------------------------|
| Entity                                                                                                                                                                      | Type             | Interest Held By                                                                |
| National Institute on Aging                                                                                                                                                 | Grant / Contract | Self                                                                            |
| <i>Recipient Name:</i> Vincent Mor<br><i>Grant / Contract Description:</i> 3P01AG027296-11S1, U54063546-S5<br><i>Additional Information:</i> Dr. White is a co-investigator |                  | <i>Recipient Type:</i> Institution<br><i>Grant / Contract Purpose:</i> Research |
| PACE Organization of Rhode Island                                                                                                                                           | Employment       | Self                                                                            |
| <i>Title:</i> Nurse practitioner, per diem<br><i>Additional Information:</i> 8 hours per week                                                                               |                  | <i>Position Description:</i> Patient care                                       |

Additional Questions:

- Are there other relationships or activities that readers could perceive to have influenced, or that give the appearance of potentially influencing, what you wrote in the submitted work?  
No.
- What is the manuscript title?  
Incident SARS-CoV-2 Infections Among mRNA-Vaccinated and Unvaccinated Nursing Home Residents
- Are you the corresponding author?  
Yes.
  - Please list the other authors' names here.  
Xiaofei Yang, Carolyn Blackman, Richard A. Feifer, Stefan Gravenstein, Vincent Mor

Certification

I certify that the information provided in this disclosure is complete and accurate.

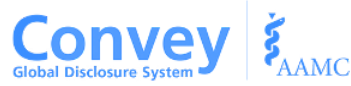

**Disclosure Purpose:** 21-04849

### Summary of Interests

I do not have any interests to disclose at this time.

### Additional Questions:

- Are there other relationships or activities that readers could perceive to have influenced, or that give the appearance of potentially influencing, what you wrote in the submitted work?**  
No.
- What is the manuscript title?**  
Incident SARS-CoV-2 Infections Among mRNA-Vaccinated and Unvaccinated Nursing Home Residents
- Are you the corresponding author?**  
No.

### Certification

I certify that the information provided in this disclosure is complete and accurate.
